# Supplementary material for: The Influence of Individualized Three-Dimensional Holographic Models on Patients’ Knowledge Qualified for Intervention in the Treatment of Peripheral Arterial Disease (PAD)
Source: MDPI journal article supplement (doi:10.3390/jcdd10110464), 2023-11-15
Supplement: s1 [file s1]

## Supplementary Materials

**Table S1.** Demographic data and comorbidities of the patients

|                                       | Number of patients | Percentage of people |
|---------------------------------------|--------------------|----------------------|
| Age (years), mean $\pm$ SD            | 68.55 $\pm$ 8.57   |                      |
| Female sex                            | 23                 | 28.75                |
| Male sex                              | 57                 | 66.25                |
| Education                             |                    |                      |
| Primary school                        | 14                 | 17.5                 |
| High school                           | 54                 | 67.5                 |
| University degree                     | 9                  | 11.25                |
| <i>Comorbidities</i>                  |                    |                      |
| Hypertension                          | 64                 | 81.01                |
| DM2                                   | 28                 | 35.44                |
| Asthma                                | 8                  | 10.13                |
| Chronic obstructive pulmonary disease | 5                  | 6.33                 |
| PAD                                   | 79                 | 100.0                |
| Coronary artery disease               | 25                 | 31.65                |
| Atrial fibrillation                   | 13                 | 16.46                |
| TIA                                   | 4                  | 5.06                 |
| Chronic kidney disease                | 8                  | 10.13                |
| Dementia                              | 3                  | 3.80                 |
| Parkinson's disease                   | 0                  | 0.00                 |
| Other mental disorders                | 0                  | 0.00                 |
| <i>Surgery history</i>                |                    |                      |
| CABG                                  | 12                 | 15.19                |
| PTA                                   | 33                 | 41.77                |
| PTCA                                  | 15                 | 18.99                |
| Smoking                               | 6                  | 7.5                  |
| Non or former smoker                  | 74                 | 92.5                 |

**Table S2.** Patient Knowledge Questionnaire on PTA i PAD; In the first question we used the Likert scale (1-5), in the following questions we used the nominal scale (know or don't know).

| Question                           | Before | After |
|------------------------------------|--------|-------|
| What procedure will be performed?  |        |       |
| Which vessel is obstructed?        |        |       |
| What is a thrombosis?              |        |       |
| What are the symptoms of ischemia? |        |       |
| What is the procedure of PTA?      |        |       |

---

In which part of the body will the procedure be performed?

---

How is PTA performed?

---

What happens if ischemia is not treated?

---

Why is PTA done?

---
